# Supplementary material
Source: PubMed Central journal article supplement (PMC7458417)
Supplement: jf0c02674_si_001.pdf [file jf0c02674_si_001.pdf]

## Supporting information

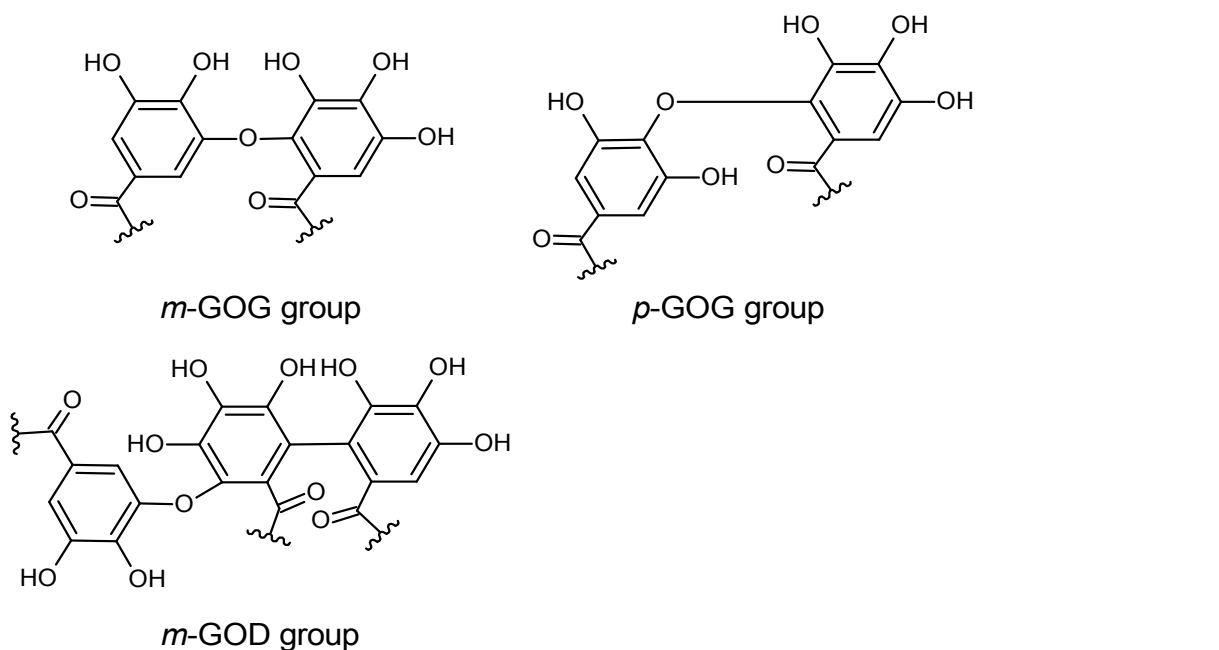

**Figure S1.** Structure of dehydrodigalloyl group (GOG) and galloyl-O-digalloyl (GOD) bonds present in oligomeric ellagitannins.

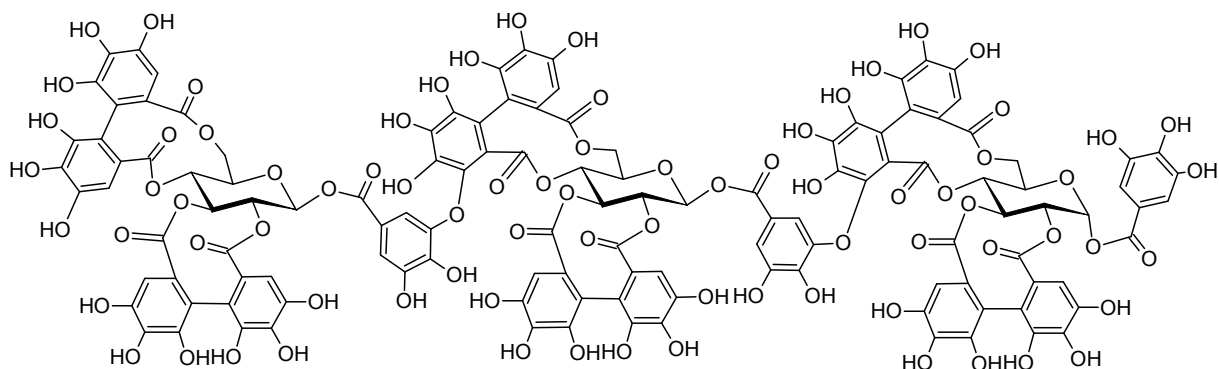

**Figure S2.** Structure of lambertianin C.

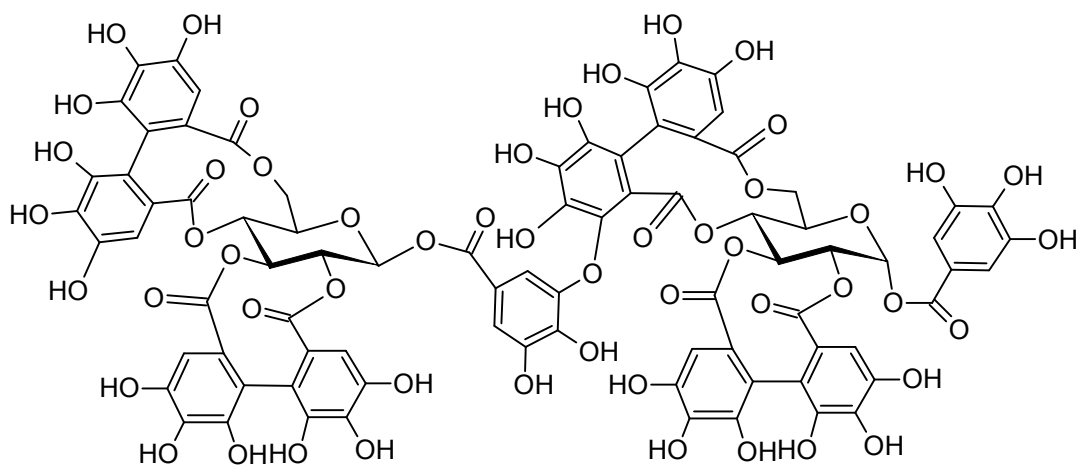

**Figure S3.** Structure of sanguin H-6.

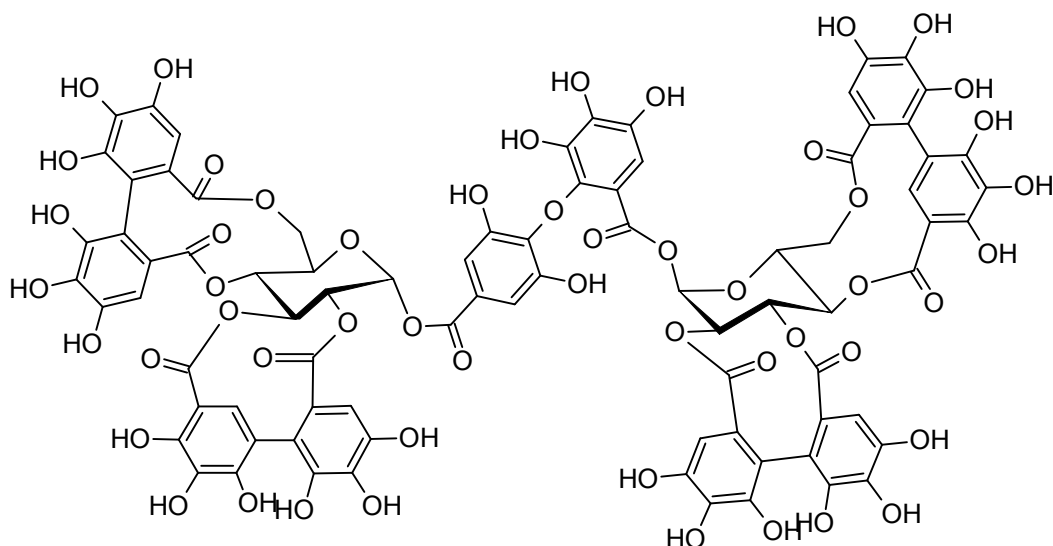

**Figure S4.** Structure of agrimoniin.

**Table S1.** Analytical parameters used for quantitative analysis.

| substance      | linear range | slope (a) | offset (b) | R <sup>2</sup> | LOD  | LOQ  |
|----------------|--------------|-----------|------------|----------------|------|------|
|                | mg/L         |           |            |                | mg/L | mg/L |
| lambertianin C | 5–395        | 15.95     | 6.08       | 0.999          | 1.25 | 3.79 |
| sanguiin H-6   | 5–225        | 20.76     | -5.80      | 0.999          | 0.80 | 2.41 |
| agrimoniin     | 5 – 249      | 18.19     | -4.58      | 0.999          | 1.29 | 3.90 |
| ellagic acid   | 1–48         | 56.07     | -10.49     | 0.999          | 0.20 | 0.60 |

**Table S2.** The parameters characterizing the hydrolysis of the researched ellagitannins in different environments.

| Ellagitannin   | $\tau_{1/2}$ (h)           |                           |                           | Loss of initial ellagitannin after hydrolysis (%) |                            |                             | Share of EA in loss of initial amount of ellagitannin after hydrolysis (%) |                            |                           | An amount of individual identified products |                       |                       |
|----------------|----------------------------|---------------------------|---------------------------|---------------------------------------------------|----------------------------|-----------------------------|----------------------------------------------------------------------------|----------------------------|---------------------------|---------------------------------------------|-----------------------|-----------------------|
|                | pH 0.9, temp. 95°C, 6 h    | pH 3, temp. 95°C, 6 h     | pH 7, temp. 37°C, 3 h     | pH 0.9, temp. 95°C, 6 h                           | pH 3, temp. 95°C, 6 h      | pH 7, temp. 37°C, 3 h       | pH 0.9, temp. 95°C, 6 h                                                    | pH 3, temp. 95°C, 6 h      | pH 7, temp. 37°C, 3 h     | pH 0.9, temp. 95°C, 6 h                     | pH 3, temp. 95°C, 6 h | pH 7, temp. 37°C, 3 h |
| Lambertianin C | 1.9 <sup>ab</sup><br>± 0.3 | 6.2 <sup>b</sup><br>± 0.5 | 1.1 <sup>a</sup><br>± 0.1 | 95.0 <sup>a</sup><br>± 1.8                        | 49.1 <sup>b</sup><br>± 2.1 | 80.4 <sup>ab</sup><br>± 7.2 | 26.6 <sup>c</sup><br>± 2.4                                                 | 1.9 <sup>ab</sup><br>± 0.1 | 4.7 <sup>b</sup><br>± 0.2 | 25                                          | 17                    | 12                    |
| Sanguiin H-6   | 2.2 <sup>b</sup><br>± 0.3  | 8.0 <sup>c</sup><br>± 0.4 | 2.7 <sup>c</sup><br>± 0.2 | 85.0 <sup>b</sup><br>± 2.4                        | 36.9 <sup>a</sup><br>± 1.4 | 85.5 <sup>ab</sup><br>± 5.1 | 11.3 <sup>a</sup><br>± 0.8                                                 | 0.7 <sup>a</sup><br>± 0.1  | 3.0 <sup>a</sup><br>± 0.1 | 17                                          | 10                    | 11                    |
| Agrimoniin     | 1.3 <sup>a</sup><br>± 0.1  | 3.6 <sup>a</sup><br>± 0.2 | 1.8 <sup>b</sup><br>± 0.2 | 95.0 <sup>a</sup><br>± 3.7                        | 65.0 <sup>c</sup><br>± 3.9 | 67.4 <sup>a</sup><br>± 2.7  | 17.9 <sup>b</sup><br>± 1.1                                                 | 1.7 <sup>ab</sup><br>± 0.2 | 7.6 <sup>c</sup><br>± 0.5 | 21                                          | 9                     | 11                    |

Values in the column marked with the same letter do not differ statistically significantly at the level of  $p \leq 0,05$ ;  $\tau_{1/2}$  – half-life; the value  $\tau_{1/2}$  was calculated on the basis of the graphs depicting the loss of the researched ellagitannins during their hydrolysis reaction.
